# Supplementary material for: The Influence of Motivators and Barriers to Exercise on Attaining Physical Activity and Sedentary Time Guidelines among Canadian Undergraduate Students
Source: MDPI journal article supplement (doi:10.3390/ijerph191912225), 2022-09-27
Supplement: s1 [file s1]

**Table S1.** Distribution of the undergraduate student sample based geographical location of institution by province.

| Province/Territory      | n (%)     |
|-------------------------|-----------|
| Ontario                 | 104 (30%) |
| Nova Scotia             | 66 (19%)  |
| British Columbia        | 60 (18%)  |
| Alberta                 | 40 (12%)  |
| Manitoba                | 33 (10%)  |
| New Brunswick           | 16 (5%)   |
| Newfoundland & Labrador | 14 (4%)   |
| Quebec                  | 4 (1%)    |
| Saskatchewan            | 3 (1%)    |
| Prince Edward Island    | 1 (<1%)   |

**Table S2.** The selection frequency and proportion for the top four motivators and barriers in respondents who self-reported as a varsity athlete, female, obese (body mass index (BMI)  $\geq 30$  kg•m<sup>-2</sup>), health student, or enrolled at a West, Central or Atlantic Canadian institution at the time of survey response.

| Motivator/Barrier (n)                  | n (%) of Varsity Athletes | n (%) of Females | n (%) BMI $\geq 30$ kg•m <sup>-2</sup> | n (%) in Health | n (%) in West | n (%) of Central | n (%) in Atlantic |
|----------------------------------------|---------------------------|------------------|----------------------------------------|-----------------|---------------|------------------|-------------------|
| Improved Physical Health (254)         | 41 (16)                   | 209 (82)         | 32 (13)                                | 178 (71)        | 80 (31)       | 109 (43)         | 65 (26)           |
| Improved Cognitive/Mental Health (228) | 35 (15)                   | 202 (89)         | 25 (11)                                | 161 (71)        | 68 (30)       | 95 (42)          | 65 (29)           |
| Improved Physical Appearance (203)     | 26 (13)                   | 172 (85)         | 26 (13)                                | 69 (34)         | 54 (27)       | 90 (44)          | 59 (29)           |
| Athletic Performance (94)              | 34 (36)                   | 66 (70)          | 11 (12)                                | 39 (41)         | 25 (26)       | 35 (37)          | 34 (36)           |
| School Obligations (232)               | 39 (17)                   | 190 (82)         | 27 (12)                                | 172 (74)        | 81 (35)       | 89 (38)          | 62 (27)           |
| Time Commitment (197)                  | 36 (18)                   | 161 (82)         | 27 (14)                                | 132 (67)        | 64 (32)       | 83 (42)          | 50 (25)           |
| Job Obligations (109)                  | 12 (11)                   | 93 (85)          | 15 (14)                                | 74 (68)         | 29 (27)       | 56 (51)          | 24 (22)           |
| Lack of Fitness Classes (88)           | 20 (23)                   | 72 (82)          | 8 (9)                                  | 56 (64)         | 25 (28)       | 30 (34)          | 33 (38)           |

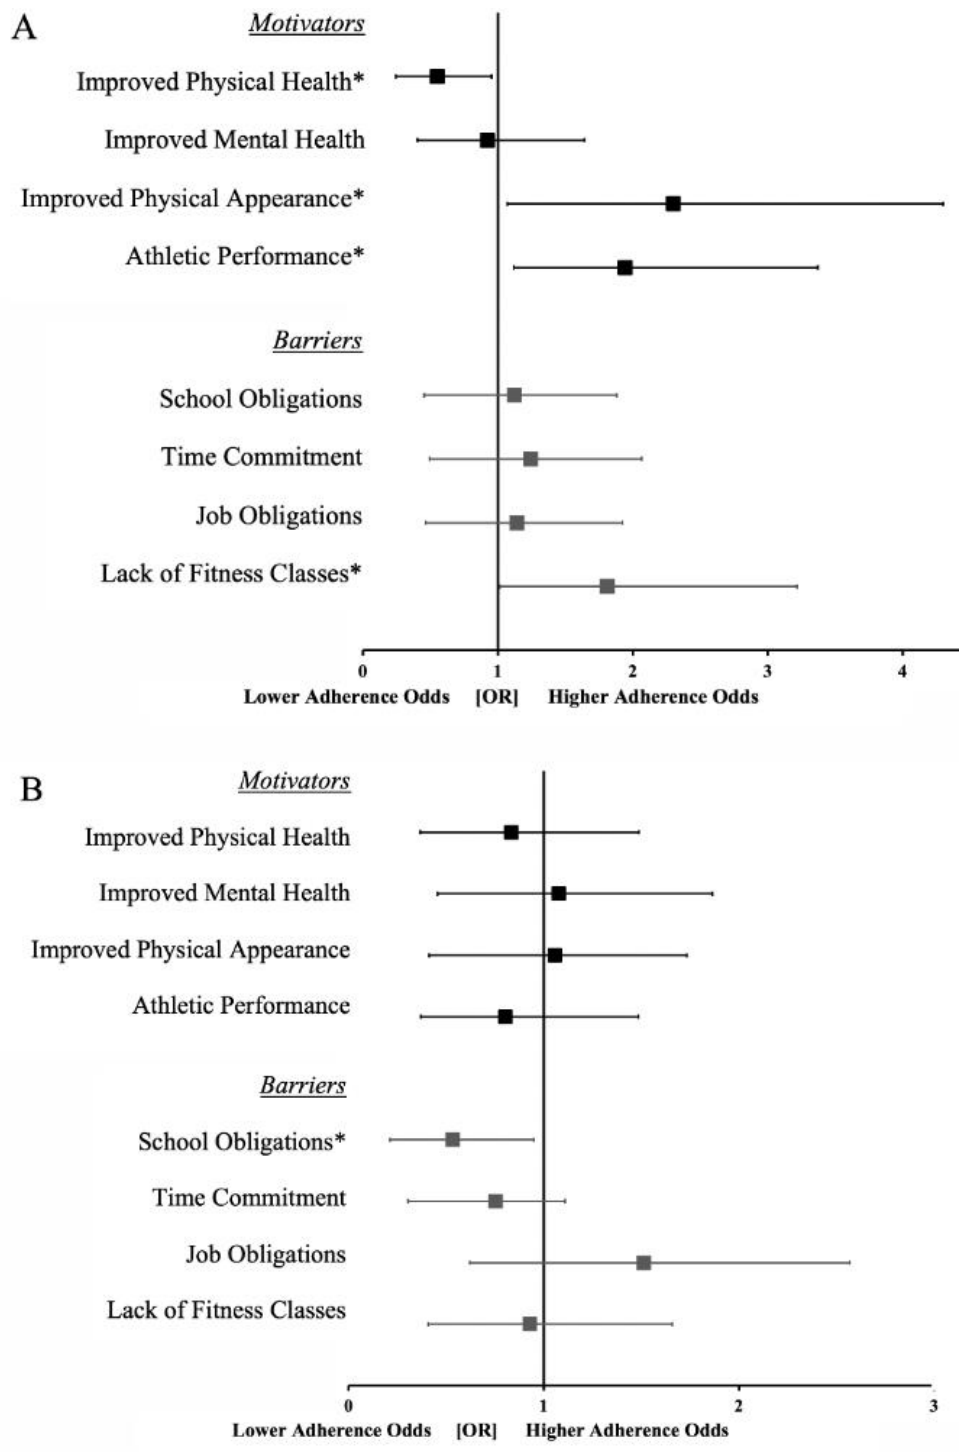

**Figure S1.** Forest Plot displaying the odds ratio (OR)  $\pm$  95% confidence intervals for the motivators and barriers to achieving the physical activity (panel A) and sedentary time (panel B) guidelines in females only. \*, indicates a significance of  $p < 0.05$ . Note: Due to odds ratios having a minimum value of 0 (i.e., cannot be less than 0) and an infinite maximum value, the 95% confidence intervals were asymmetrical in magnitude.
